# Supplementary material for: Vectors expressing efficient RNA decoys achieve the long-term suppression of specific microRNA activity in mammalian cells
Source: PubMed Central journal article supplement — Nucleic Acids Res. 2009 Feb 17;37(6):e43. doi: 10.1093/nar/gkp040 (PMC2665227; doi:10.1093/nar/gkp040), 2009-02-17

# Supplementary Figure S1

(A) pMXs-GIN-miR140-3pT

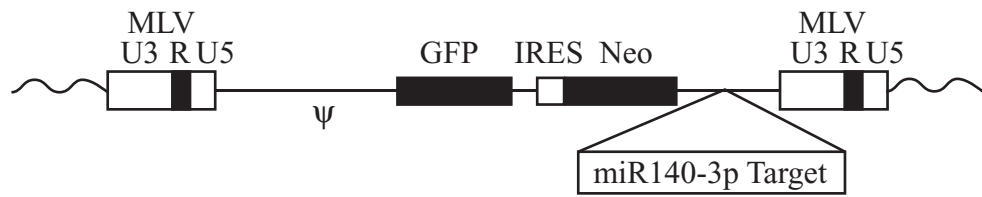

(B) pMXs-GIN-miR140-5pT

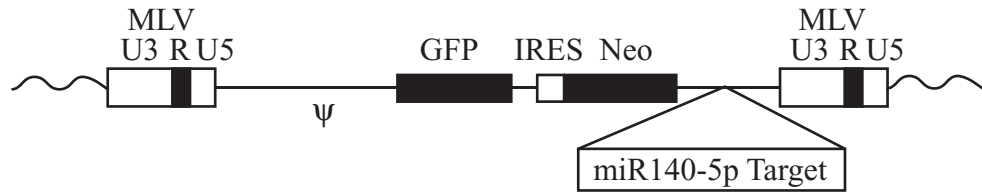

(C) pSSCH-miR140-5p/140-3p

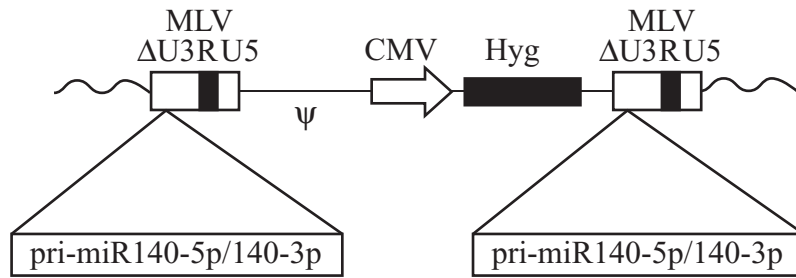

(D) Decoy RNA expression lentivirus vector, pLSP

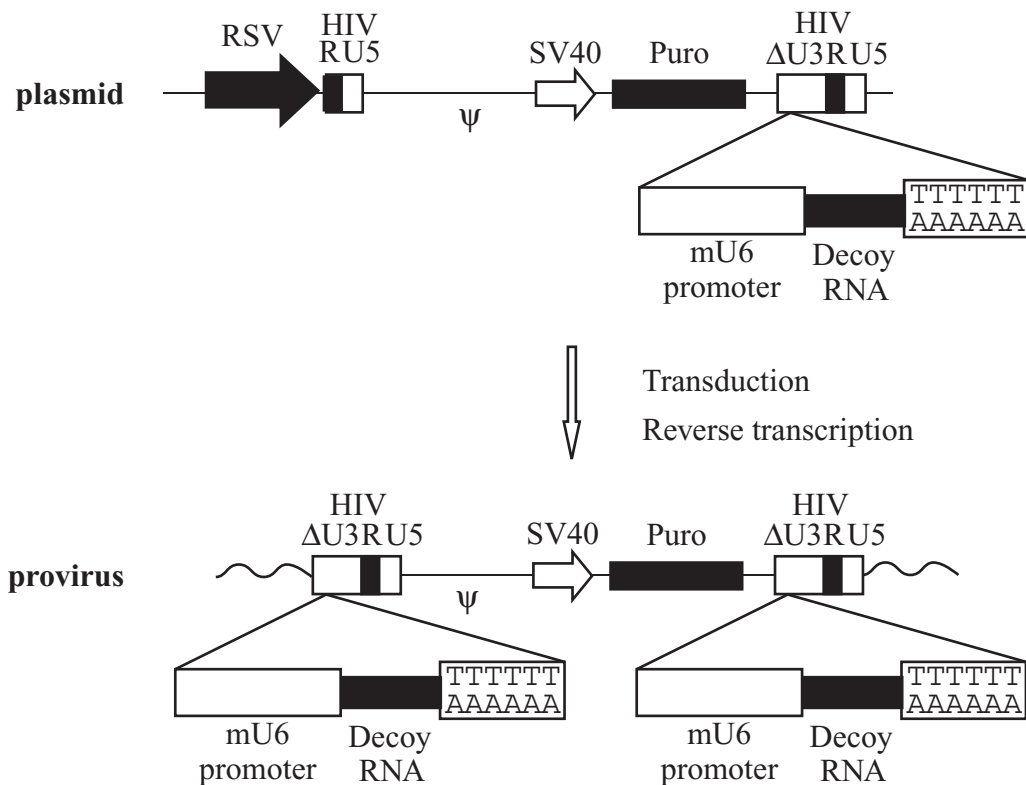

Supplement: gkp040_1.pdf [file gkp040_1.pdf]
