# Supplementary material for: Vectors expressing efficient RNA decoys achieve the long-term suppression of specific microRNA activity in mammalian cells
Source: PubMed Central journal article supplement — Nucleic Acids Res. 2009 Feb 17;37(6):e43. doi: 10.1093/nar/gkp040 (PMC2665227; doi:10.1093/nar/gkp040), 2009-02-17

# Supplementary Figure S2

A; HeLa S3

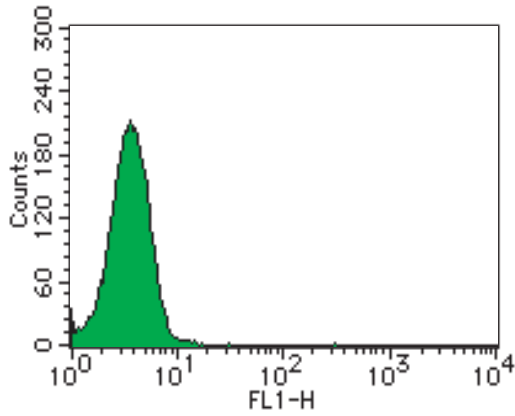

B; HeLaS3 harbouring the miR140-3p reporter

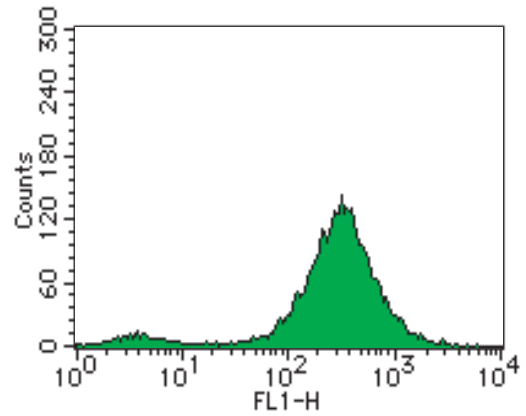

C; HeLaS3 harbouring the miR140-3p reporter and the miR140-5p/140-3p expression vector

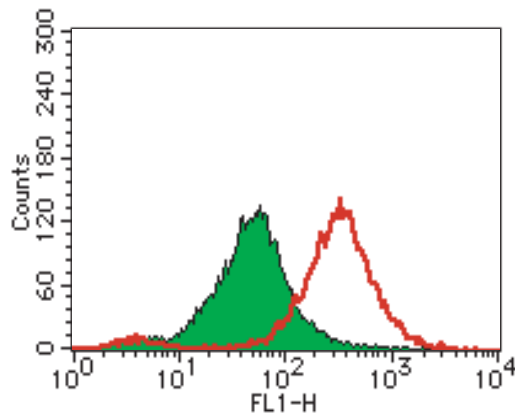

D; C cells transduced with TuD-miR140-3p-4ntin    E; C cells transduced with TuD-miR140-5p-4ntin

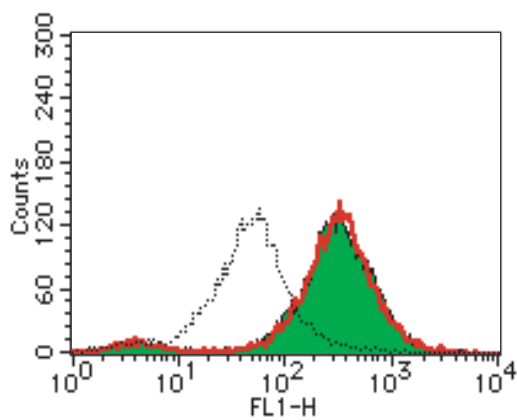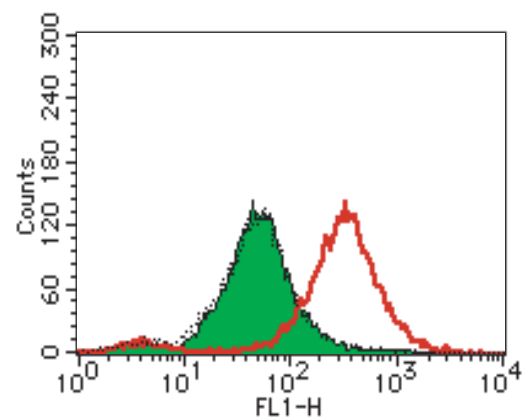

Supplement: gkp040_2.pdf [file gkp040_2.pdf]
