# Supplementary material for: Vectors expressing efficient RNA decoys achieve the long-term suppression of specific microRNA activity in mammalian cells
Source: PubMed Central journal article supplement — Nucleic Acids Res. 2009 Feb 17;37(6):e43. doi: 10.1093/nar/gkp040 (PMC2665227; doi:10.1093/nar/gkp040), 2009-02-17
Supplement: gkp040_4.pdf [file gkp040_4.pdf]

# Supplementary Figure S4

|                                                                                                                              |                                                                                                                                                                                                                                                                  |
|------------------------------------------------------------------------------------------------------------------------------|------------------------------------------------------------------------------------------------------------------------------------------------------------------------------------------------------------------------------------------------------------------|
| <p><b>TuD-miR140-3p-pf</b></p>                                                                                               | <p style="text-align: center;">MBS</p> <pre> 5'- GACGGCGCUAGGAUCAUC AAC-U UUCUACC UACAA G U 3'- UUCUGCCGCGAUCCUAGUAG CCGUGG CUGUGG GUAUUCUG U AACAU CCAUCUU U-CAA CAUAAGAC C A </pre> <p style="text-align: center;">MBS</p>                                     |
| <p>MBS 5'- UCCGUGGUUCUACCCUGUGGUA -3'<br/>miR140-3p 3'- AGGCACCAAGAU GGGACACCAU -5'</p>                                      |                                                                                                                                                                                                                                                                  |
| <p><b>TuD-miR140-3p-4ntin</b></p>                                                                                            | <p style="text-align: center;">MBS</p> <pre> 5'- GACGGCGCUAGGAUCAUC AAC-U UUCUAAUCUCC UACAA G U 3'- UUCUGCCGCGAUCCUAGUAG CCGUGG CUGUGG GUAUUCUG U AACAU CCUCUAAUCUU U-CAA CAUAAGAC C A </pre> <p style="text-align: center;">MBS</p>                             |
| <p>MBS 5'- UCCGUGGUUCU<sup>UC</sup><sub>A</sub>U<sup>U</sup>CCUGUGGUA -3'<br/>miR140-3p 3'- AGGCACCAAGAU--GGGACACCAU -5'</p> |                                                                                                                                                                                                                                                                  |
| <p><b>TuD-miR140-5p-4ntin</b></p>                                                                                            | <p style="text-align: center;">MBS</p> <pre> 5'- GACGGCGCUAGGAUCAUC AACCUACCAUAG CAUCAAA ACC ----ACUGCAA G U 3'- UUCUGCCGCGAUCCUAGUAG CCGUGG CUGUGG GUAUUCUG U AACAU CCA UGG GAUACCAUCCAA CAUAAGAC C A </pre> <p style="text-align: center;">MBS</p>             |
| <p>MBS 5'- CUACCAUAGGGU<sup>AU</sup><sub>C</sub>AAAACCACUG -3'<br/>miR140-5p 3'- GAUGGUAUCCCA--UUUUGGUGAC -5'</p>            |                                                                                                                                                                                                                                                                  |
| <p><b>TuD-miR21-4ntin</b></p>                                                                                                | <p style="text-align: center;">MBS</p> <pre> 5'- GACGGCGCUAGGAUCAUC AACUCAUCA AUG UGAU ---AAGCUCAA G U 3'- UUCUGCCGCGAUCCUAGUAG GUCA ACUG UAGU ACUG GUAUUCUG U AACAUUGAA--- GUA ACUACAACUCAA CAUAAGAC C A </pre> <p style="text-align: center;">MBS</p>          |
| <p>MBS 5'- UCAACAUCAGUC<sup>AU</sup><sub>A</sub>UGUAAGCUA -3'<br/>miR21 3'- AGUUGUAGUCAG--ACUAUUCGAU -5'</p>                 |                                                                                                                                                                                                                                                                  |
| <p><b>TuD-miR21-pf</b></p>                                                                                                   | <p style="text-align: center;">MBS</p> <pre> 5'- GACGGCGCUAGGAUCAUC AACUCAAC- U AAGCUCAA G U 3'- UUCUGCCGCGAUCCUAGUAG AUCAG CUGAU GUAUUCUG U AACAUUGAA UAGUC GACUA CAUAAGAC C U -CAACUCAA A </pre> <p style="text-align: center;">MBS</p>                        |
| <p>MBS 5'- UCAACAUCAGUCUGAUUAGCUA -3'<br/>miR21 3'- AGUUGUAGUCAGACUAUUCGAU -5'</p>                                           |                                                                                                                                                                                                                                                                  |
| <p><b>TuD-miR16-4ntin</b></p>                                                                                                | <p style="text-align: center;">MBS</p> <pre> 5'- GACGGCGCUAGGAUCAUC AACCGCCAUAUUUA --CGUGCUGCUACA G U 3'- UUCUGCCGCGAUCCUAGUAG GAUC CUGAU GUAUUCUG U AACAU CGUCGUGC-- AUUUUAUACCGCCAA CAUAAGAC C A </pre> <p style="text-align: center;">MBS</p>                 |
| <p>MBS 5'- CGCCAUAUUUA<sup>AU</sup><sub>G</sub>CGUGCUGCUA -3'<br/>miR16 3'- GCGGUUAUAAA--GCACGACGAU -5'</p>                  |                                                                                                                                                                                                                                                                  |
| <p><b>TuD-miR195-4ntin</b></p>                                                                                               | <p style="text-align: center;">MBS</p> <pre> 5'- GACGGCGCUAGGAUCAUC AACGCCAAUAUUUCAUGUG U GC -----UACAA G U 3'- UUCUGCCGCGAUCCUAGUAG GC GC UAGU ACUG GUAUUCUG U AACAU----- CG CG U UGUGUAUUUAUACCGCAA CAUAAGAC C A </pre> <p style="text-align: center;">MBS</p> |
| <p>MBS 5'- GCCAAUAUUU<sup>AAU</sup><sub>C</sub>UGUGCUGCUA -3'<br/>miR16 3'- GCGGUUAUAAA<sup>G</sup>---GCACGACGAU -5'</p>     |                                                                                                                                                                                                                                                                  |
| <p><b>TuD-miR497-4ntin</b></p>                                                                                               | <p style="text-align: center;">MBS</p> <pre> 5'- GACGGCGCUAGGAUCAUC AACACAAAC CACAGA A UCUGUG CUGCUGCAA G U 3'- UUCUGCCGCGAUCCUAGUAG GUGUCU AGACAC GUAUUCUG U AACGUCGUC A CAAACACAA CAUAAGAC C A </pre> <p style="text-align: center;">MBS</p>                   |
| <p>MBS 5'- ACAAA<sup>CCA</sup> CAGAAUC UGUGCUGCUG -3'<br/>miR16 3'- GC<sup>GGU</sup>UAUAAA<sup>GC</sup>GCACGACGAU -5'</p>    |                                                                                                                                                                                                                                                                  |
| <p><b>TuD-NC</b></p>                                                                                                         | <p style="text-align: center;">MBS</p> <pre> 5'- GACGGCGCUAGGAUCAUC AACAGCCACAAC A UCUAUAUCAUCAA G U 3'- UUCUGCCGCGAUCCUAGUAG GA UC GUAUUCUG U AACUACUAUAUCU CU AG CAUAAGAC C A CAACCCGAACAA A </pre> <p style="text-align: center;">MBS</p>                     |
