# Supplementary material for: Vectors expressing efficient RNA decoys achieve the long-term suppression of specific microRNA activity in mammalian cells
Source: PubMed Central journal article supplement — Nucleic Acids Res. 2009 Feb 17;37(6):e43. doi: 10.1093/nar/gkp040 (PMC2665227; doi:10.1093/nar/gkp040), 2009-02-17
Supplement: gkp040_9.pdf [file gkp040_9.pdf]

**Supplementary Table S1.** Primer pairs used for the construction of GFP reporter vectors.

| Primers                            | Sequence                                 |
|------------------------------------|------------------------------------------|
| pMXs-GIN-miR140-3pT s <sup>+</sup> | 5'- GGCCGCTCCGTGGTTCTACCCTGTGGTAGGG -3'  |
| pMXs-GIN-miR140-3pT a <sup>+</sup> | 5'- TCGACCCTACCACAGGGTAGAACCACGGAGC-3'   |
| pMXs-GIN-miR140-5pT s              | 5'- GGCCGCTCTACCATAGGGTAAAACCACTGGGG -3' |
| pMXs-GIN-miR140-5pT a              | 5'- TCGACCCCAGTGGTTTTACCCTATGGTAGAGC -3' |
| PCR-miR140-5p/140-3p s             | 5'- TGCTTGCTGGTGGTGTAGTC -3'             |
| PCR-miR140-5p/140-3p a             | 5'- ACCAACACCCACCCAATAGA -3'             |

s<sup>+</sup>; sense strand

a<sup>+</sup>; antisense strand

**Supplementary Table S2.** Primer pairs used for the construction of lentivirus vector pLSP.

| Primers                | Sequence                            |
|------------------------|-------------------------------------|
| pLenti6/V5-GW/lacZ     | s 5'- GAGTCTAGATTTCGAGCTCGGTACC-3'  |
| pLenti6/V5-GW/lacZ     | a 5'- CTCGTTTAAACTCCTCTCACTCTCTG-3' |
| pCR2.1-ΔU3/HIV-1 3'LTR | s 5'- CTTGCTAGCCTTCGTTGGGAG -3'     |
| pCR2.1-ΔU3/HIV-1 3'LTR | a 5'- GAGGTCGACACAAGATCTGCT -3'     |
| insert oligo           | s 5'- CTAGCGGATCCATGAGAATTCG -3'    |
| insert oligo           | a 5'- TCGACGAATTCTCATGGATCCG -3'    |

**Supplementary Table S3.** Primer pair used for the construction of TuD RNA shuttle vector.

| Primers              |   | Sequence                                                                 |
|----------------------|---|--------------------------------------------------------------------------|
| TuD RNA shuttle      | s | 5'- TTTGACGGCGCTAGGATCATCGGAGACGGTACCGTCTCGATGATCCTAGCGCCGTCTTTTTTG -3'  |
| TuD RNA shuttle      | a | 5'- AATTCAAAAAAGACGGCGCTAGGATCATCGAGACGGTACCGTCTCCGATGATCCTAGCGCCGT-3'   |
| TuD RNA protoshuttle | s | 5'- TTTGACGGCGCTAGGATCATCGGAGACGGTACCGTCTCCGATGATCCTAGCGCCGTCTTTTTTG -3' |
| TuD RNA protoshuttle | a | 5'- AATTCAAAAAAGACGGCGCTAGGATCATCGGAGACGGTACCGTCTCCGATGATCCTAGCGCCGT-3'  |

**Supplementary Table S4.** Primer pairs used for the construction of TuD RNA expression vectors.

| Primers                 | Sequence                                                                                                |
|-------------------------|---------------------------------------------------------------------------------------------------------|
| TuD RNA-miR140-5p-4ntin | s 5'- CATCAACCTACCATAGGGTCATCAAAACCACTGCAAGTATTCTGGTCACAGAATACAACCTACCATAGGGTCATCAAAACCACTGCAAG -3'     |
| TuD RNA-miR140-5p-4ntin | a 5'- TCATCTTGCAGTGGTTTTGATGACCCTATGGTAGGTTGTATTCTGTGACCAGAATACTTGCAGTGGTTTTGATGACCCTATGGTAGGTT -3'     |
| TuD RNA-miR140-3p-4ntin | s 5'- CATCAACTCCGTGGTTCTAATCTCCCTGTGGTACAAGTATTCTGGTCACAGAATACAACCTCCGTGGTTCTAATCTCCCTGTGGTACAAG -3'    |
| TuD RNA-miR140-3p-4ntin | a 5'- TCATCTTGTACCACAGGGAGATTAGAACCACGGAGTTGTATTCTGTGACCAGAATACTTGTACCACAGGGAGATTAGAACCACGGAGTT-3'      |
| TuD RNA-miR140-3p-pf    | s 5'- CATCAACTCCGTGGTTCTACCCTGTGGTACAAGTATTCTGGTCACAGAATACAACCTCCGTGGTTCTACCCTGTGGTACAA -3'             |
| TuD RNA-miR140-3p-pf    | a 5'- CATCTTGTACCACAGGGTAGAACCACGGAGTTGTATTCTGTGACCAGAATACTTGTACCACAGGGTAGAACCACGGAGTT -3'              |
| TuD RNA-miR21-4ntin     | s 5'- CATCAACTCAACATCAGTCAATGTGATAAGCTACAAGTATTCTGGTCACAGAATACAACCTCAACATCAGTCAATGTGATAAGCTACAAG -3'    |
| TuD RNA-miR21-4ntin     | a 5'- TCATCTTGTAGCTTATCACATTGACTGATGTTGAGTTGTATTCTGTGACCAGAATACTTGTAGCTTATCACATTGACTGATGTTGAGTT -3'     |
| TuD RNA-miR21-pf        | s 5'- CATCAACTCAACATCAGTCTGATAAGCTACAAGTATTCTGGTCACAGAATACAACCTCAACATCAGTCTGATAAGCTACAAG -3'            |
| TuD RNA-miR21-pf        | a 5'- TCATCTTGTAGCTTATCAGACTGATGTTGAGTTGTATTCTGTGACCAGAATACTTGTAGCTTATCAGACTGATGTTGAGTT-3'              |
| TuD RNA-miR16-4ntin     | s 5'- CATCAACCGCCAATATTTAGATCCGTGCTGCTACAAGTATTCTGGTCACAGAATACAACCGCCAATATTTAGATCCGTGCTGCTACAAG -3'     |
| TuD RNA-miR16-4ntin     | a 5'- TCATCTTGTAGCAGCACGGATCTAAATATTGGCGGTTGTATTCTGTGACCAGAATACTTGTAGCAGCACGGATCTAAATATTGGCGGTT -3'     |
| TuD RNA-miR195-4ntin    | s 5'- CATCAACGCCAATATTTCAATGTGTGCTGCTACAAGTATTCTGGTCACAGAATACAACGCCAATATTTCAATGTGTGCTGCTACAAG -3'       |
| TuD RNA-miR195-4ntin    | a 5'- TCATCTTGTAGCAGCACACATTGAAATATTGGCGTGTATTCTGTGACCAGAATACTTGTAGCAGCACACATTGAAATATTGGCGTT -3'        |
| TuD RNA-miR497-4ntin    | s 5'- CATCAACACAAACCACAGAATCTGTGCTGCTGCAAGTATTCTGGTCACAGAATACAACACAAACCACAGAATCTGTGCTGCTGCAAG -3'       |
| TuD RNA-miR497-4ntin    | a 5'- TCATCTTGCAGCAGCACAGATTCTGTGGTTTTGTGTTGTATTCTGTGACCAGAATACTTGCAGCAGCACAGATTCTGTGGTTTTGTGTT -3'     |
| TuD RNA-NC              | s 5'- CATCAACAAGCCACAACGAATCTCTATATCATCAAGTATTCTGGTCACAGAATACAACAAGCCACAACGAATCTCTATATCATCAAG -3'       |
| TuD RNA-NC              | a 5'- TCATCTTGATGATATAGAGATTTCGTTGTGGCTTGTGTTGTATTCTGTGACCAGAATACTTGTATGATATAGAGATTTCGTTGTGGCTTGTGTT-3' |

**Supplementary Table S5.** Primer pairs used for the construction of Decoy RNA expression vectors (To be continued).

| Primers        | Sequence                                                                                                                                                            |
|----------------|---------------------------------------------------------------------------------------------------------------------------------------------------------------------|
| Decoy RNA #001 | s 5'- TTTGACGGCGCTGGATGCTTGGATCCGTGGTTCTACCCTGTGGTAAGGAAGCATCCAGCGCCGTCTTTTTTG -3'                                                                                  |
| Decoy RNA #001 | a 5'- AATTCAAAAAAGACGGCGCTGGATGCTTCCTTACCACAGGGTAGAACCACGGATCCAAGCATCCAGCGCCGT -3'                                                                                  |
| Decoy RNA #002 | s 5'- TTTGACGGCGCTAGGATGCTTGGATCCGTGGTTCTACCCTGTGGTAAGGAAGCATCCTAGCGCCGTCTTTTTTG -3'                                                                                |
| Decoy RNA #002 | a 5'- AATTCAAAAAAGACGGCGCTAGGATGCTTCCTTACCACAGGGTAGAACCACGGATCCAAGCATCCTAGCGCCGT -3'                                                                                |
| Decoy RNA #003 | s 5'- TTTGACAGCGCTCTACGATGAAGGCTCCGTGGTTCTACCCTGTGGTAAGGTTTCATCGTAGAGCGCTGTCTTTTTTG -3'                                                                             |
| Decoy RNA #003 | a 5'- AATTCAAAAAAGACAGCGCTCTACGATGAACCTTACCACAGGGTAGAACCACGGAGCCTTCATCGTAGAGCGCTGT -3'                                                                              |
| Decoy RNA #004 | s 5'- TTTGACAGCGCTCTACGATGCAAGGCTCCGTGGTTCTACCCTGTGGTAAGGTTGCATCGTAGAGCGCTGTCTTTTTTG -3'                                                                            |
| Decoy RNA #004 | a 5'- AATTCAAAAAAGACAGCGCTCTACGATGCAACCTTACCACAGGGTAGAACCACGGAGCCTTGCATCGTAGAGCGCTGT -3'                                                                            |
| Decoy RNA #005 | s 5'- TTTGACAGCGCTCGCAGGATGCTTGGCTCCGTGGTTCTACCCTGTGGTAAGGAAGCATCCTGCGAGCGCTGTCTTTTTTG -3'                                                                          |
| Decoy RNA #005 | a 5'- AATTCAAAAAAGACAGCGCTCGCAGGATGCTTCCTTACCACAGGGTAGAACCACGGAGCCAAGCATCCTGCGAGCGCTGT -3'                                                                          |
| Decoy RNA #006 | s 5'- TTTGACAGCGCTCAAAGCAGGATGCTTGGCTCCGTGGTTCTACCCTGTGGTAAGGAAGCATCCTGCTTTGAGCGCTGTCTTTTTTG -3'                                                                    |
| Decoy RNA #006 | a 5'- AATTCAAAAAAGACAGCGCTCAAAGCAGGATGCTTCCTTACCACAGGGTAGAACCACGGAGCCAAGCATCCTGCTTTGAGCGCTGT -3'                                                                    |
| Decoy RNA #007 | s 5'-TTTGACGGCGCTAGGATCATCTCCGTGGTTCTACCCTGTGGTAGTATTCTGGTCACAGAATACGATGATCCTAGCGCCGTCTTTTTTG -3'                                                                   |
| Decoy RNA #007 | a 5'-AATTCAAAAAAGACGGCGCTAGGATCATCGTATTCTGTGACCAGAATACTACCACAGGGTAGAACCACGGAGATGATCCTAGCGCCGT-3'                                                                    |
| Decoy RNA #008 | s 5'-TTTGACGGCGCTAGGATCATCGTATTCTGGTACAGAATACTCCGTGGTTCTACCCTGTGGTATCTTCTAACGAGAGAAGAGATGATCCTAGCGCCGTCTTTTTTG-3'                                                   |
| Decoy RNA #008 | a 5'-AATTCAAAAAAGACGGCGCTAGGATCATCTTCTCTCGTTAGAGAAGATACCACAGGGTAGAACCACGGAGTATTCTGTGACCAGAATACGATGATCCTAGCGCCGT-3'                                                  |
| Decoy RNA #009 | s 5'-TTTGACGGCGCTAGGATCATCTCCGTGGTTCTACCCTGTGGTAGTATTCTGGTCACAGAATACTCCGTGGTTCTACCCTGTGGTAGATGATCCTAGCGCCGTCTTTTTTG-3'                                              |
| Decoy RNA #009 | a 5'-AATTCAAAAAAGACGGCGCTAGGATCATCTACCACAGGGTAGAACCACGGAGTATTCTGTGACCAGAATACTACCACAGGGTAGAACCACGGAGATGATCCTAGCGCCGT-3'                                              |
| Decoy RNA #010 | s 5'- CATCTCCGTGGTTCTACCCTGTGGTAGTATTCTGAGATCCGTGGTTCTACCCTGTGGTAAGACAGAATACTCCGTGGTTCTACCCTGTGGTA -3'                                                              |
| Decoy RNA #010 | a 5'- CATCTACCACAGGGTAGAACCACGGAGTATTCTGTCTTACCACAGGGTAGAACCACGGATCTCAGAATACTACCACAGGGTAGAACCACGGA -3'                                                              |
| Decoy RNA #011 | s 5'- CATCTCCGTGGTTCTACCCTGTGGTAGTATTCTGTCCGTGGTTCTACCCTGTGGTAGTATTCTGGTCACAGAATACTCCGTGGTTCTACCCTGTGGTACAGAATACTCCGTGGTTCTACCCTGTGGTA -3'                          |
| Decoy RNA #011 | a 5'- CATCTACCACAGGGTAGAACCACGGAGTATTCTGTACCACAGGGTAGAACCACGGAGTATTCTGTGACCAGAATACTACCACAGGGTAGAACCA CGGACAGAATACTACCACAGGGTAGAACCACGGA -3'                         |
| Decoy RNA #012 | s 5'- CATCTCCGTGGTTCTACCCTGTGGTAGTATTCTGTCCGTGGTTCTACCCTGTGGTAGTATTCTGAGATCCGTGGTTCTACCCTGTGGTAAGACA GAATACTCCGTGGTTCTACCCTGTGGTACAGAATACTCCGTGGTTCTACCCTGTGGTA -3' |
| Decoy RNA #012 | a 5'- CATCTACCACAGGGTAGAACCACGGAGTATTCTGTACCACAGGGTAGAACCACGGAGTATTCTGTCTTACCACAGGGTAGAACCACGGATCTCA GAATACTACCACAGGGTAGAACCACGGACAGAATACTACCACAGGGTAGAACCACGGA -3' |
| Decoy RNA #013 | s 5'- CATCAACTCCGTGGTTCTACCCTGTGGTACAAGTATTCTGGTACAGAATACTCCGTGGTTCTACCCTGTGGTACAA -3'                                                                              |
| Decoy RNA #013 | a 5'- CATCTGTACCACAGGGTAGAACCACGGAGTTGTATTCTGTGACCAGAATACTGTACCACAGGGTAGAACCACGGAGTT -3'                                                                            |
| Decoy RNA #014 | s 5'- TTTGACGGCGCTAGGATGCTTGGATCCGTGGTTCTAACCTGTGGTAAGGAAGCATCCTAGCGCCGTCTTTTTTG -3'                                                                                |
| Decoy RNA #014 | a 5'- AATTCAAAAAAGACGGCGCTAGGATGCTTCCTTACCACAGGGTAGAACCACGGATCCAAGCATCCTAGCGCCGT -3'                                                                                |
| Decoy RNA #015 | s 5'- TTTGACGGCGCTAGGATGCTTGGATCCGTGGTTCTAATCCCTGTGGTAAGGAAGCATCCTAGCGCCGTCTTTTTTG -3'                                                                              |
| Decoy RNA #015 | a 5'- AATTCAAAAAAGACGGCGCTAGGATGCTTCCTTACCACAGGGATTAGAACCACGGATCCAAGCATCCTAGCGCCGT -3'                                                                              |
| Decoy RNA #016 | s 5'- TTTGACGGCGCTAGGATGCTTGGATCCGTGGTTCTAATCCCTGTGGTAAGGAAGCATCCTAGCGCCGTCTTTTTTG -3'                                                                              |
| Decoy RNA #016 | a 5'- AATTCAAAAAAGACGGCGCTAGGATGCTTCCTTACCACAGGGAGTTAGAACCACGGATCCAAGCATCCTAGCGCCGT -3'                                                                             |

## Continued Supplementary Table S5.

| Primers        | Sequence                                                                                                                              |
|----------------|---------------------------------------------------------------------------------------------------------------------------------------|
| Decoy RNA #017 | s 5'- TTTGACGGCGCTAGGATGCTTGGATCCGTGGTTCTAATCTCCCTGTGGTAAGGAAGCATCCTAGCGCCGTCTTTTTTG -3'                                              |
| Decoy RNA #017 | a 5'- AATTCAAAAAAGACGGCGCTAGGATGCTTCCTTACCACAGGGAGATTAGAACCACGGATCCAAGCATCCTAGCGCCGT -3'                                              |
| Decoy RNA #018 | s 5'- CATCCTCCGTGGTTCTAATCTCCCTGTGGTACGTATTCTGGTCACAGAATACCTCCGTGGTTCTAATCTCCCTGTGGTACG -3'                                           |
| Decoy RNA #018 | a 5'- TCATCGTACCACAGGGAGATTAGAACCACGGAGGTATTCTGTGACCAGAATACGTACCACAGGGAGATTAGAACCACGGAG -3'                                           |
| Decoy RNA #019 | s 5'- CATCCCTCCGTGGTTCTAATCTCCCTGTGGTACCGTATTCTGGTCACAGAATACCCTCCGTGGTTCTAATCTCCCTGTGGTACCG -3'                                       |
| Decoy RNA #019 | a 5'- TCATCGGTACCACAGGGAGATTAGAACCACGGAGGGTATTCTGTGACCAGAATACGGTACCACAGGGAGATTAGAACCACGGAGG -3'                                       |
| Decoy RNA #020 | s 5'- CATCAACTCCGTGGTTCTAATCTCCCTGTGGTACAAGTATTCTGGTCACAGAATACAACCTCCGTGGTTCTAATCTCCCTGTGGTACAAG -3'                                  |
| Decoy RNA #020 | a 5'- TCATCTTGTACCACAGGGAGATTAGAACCACGGAGTTGTATTCTGTGACCAGAATACTTGTACCACAGGGAGATTAGAACCACGGAGTT-3'                                    |
| Decoy RNA #021 | s 5'- CATCACCTCCGTGGTTCTAATCTCCCTGTGGTACCCAGTATTCTGGTCACAGAATACACCCTCCGTGGTTCTAATCTCCCTGTGGTACCCAG -3'                                |
| Decoy RNA #021 | a 5'- TCATCTGGGTACCACAGGGAGATTAGAACCACGGAGGGTGTATTCTGTGACCAGAATACTGGGTACCACAGGGAGATTAGAACCACGGAGGGT -3'                               |
| Decoy RNA #022 | s 5'- CATCAACCTCCGTGGTTCTAATCTCCCTGTGGTACCCAAGTATTCTGGTCACAGAATACAACCTCCGTGGTTCTAATCTCCCTGTGGTACCCAAG-3'                              |
| Decoy RNA #022 | a 5'- TCATCTTGGGTACCACAGGGAGATTAGAACCACGGAGGGTGTATTCTGTGACCAGAATACTTGGGTACCACAGGGAGATTAGAACCACGGAGGGTT-3'                             |
| Decoy RNA #023 | s 5'- CGTCTCACATCAACTCCGTGGTTCTAATCTCCCTGTGGTACAAGCGACAAGAACTCCGTGGTTCTAATCTCCCTGTGGTACAAGTATTCTGAACT<br>CCGTGGTTCTAATCTCCCTGTGGT-3'  |
| Decoy RNA #023 | a 5'- CGTCTCATCATCTTGTACCACAGGGAGATTAGAACCACGGAGTTGCGACAAGTTGTACCACAGGGAGATTAGAACCACGGAGTTGTATTCTGTTG<br>TACCACAGGGAGATTAGAACCACGG-3' |

**Supplementary Table S6.** Primer pairs used for the construction of luciferase reporter vectors.

| Primers        | Sequence                                                      |
|----------------|---------------------------------------------------------------|
| pTK4.12 insert | s 5'- AATTAATAATGACTCGAGT-3'                                  |
| pTK4.12 insert | a 5'- CTAGACTCGAGTCATTATT-3'                                  |
| pGL4.74-T21    | s 5'- CTAGACCGGAATTCTCAACATCAGTCTGATAAGCTACTCGAGCGGAGGCCGG-3' |
| pGL4.74-T21    | a 5'- CCTCCGCTCGAGTAGCTTATCAGACTGATGTTGAGAATTCCGGT-3'         |
| pGL4.74-T16    | s 5'- CTAGACCGGAATTCCGCCAATATTTACGTGCTGCTACTCGAGCGGAGGCCGG-3' |
| pGL4.74-T16    | a 5'- CCTCCGCTCGAGTAGCAGCACGTAATATTGGCGGAATTCCGGT-3'          |

**Supplementary Table S7.** Primer pairs used for the construction of sponge-miR-21 expression vectors.

| Primers       |   | Sequence                                                                                                           |
|---------------|---|--------------------------------------------------------------------------------------------------------------------|
| sponge-miR-21 | s | 5'- CTCGAGTAACTCAACATCAGGACATAAGCTAAGTCTCAACATCAGGACATAAGCTATCAGTCAACATCAGGACATAAGCTACTGATCAACATCAGGACATAAGCTA -3' |
| sponge-miR-21 | a | 5'- ACCGGTTAGCTTATGTCCTGATGTTGACCGATAGCTTATGTCCTGATGTTGACAGTTAGCTTATGTCCTGATGTTGAGTTCTAGCTTATGTCCTGATGTTGATCAG -3' |



**Supplementary Table S8. Probes used for Northern blot analysis.**

| Primers     | Sequence                        |
|-------------|---------------------------------|
| TuD RNA     | 5'- GTTGATGATCCTAGCGCCGTC -3'   |
| miR-21      | 5'- TCAACATCAGTCTGATAAGCTA -3'  |
| Y4 scRNA    | 5'- GCAGTGGGGGGTTGTATACCAAC -3' |
| ACA1 snoRNA | 5'- GTGATGGAAGCATAACCTGTCTC -3' |

**Supplementary Table S9.** Sequences of LNA/DNA antisense oligos.

| Primers   | Sequence                                  |
|-----------|-------------------------------------------|
| LNA-miR21 | 5' - TCAACAT <u>CAGTCTGATA</u> AAGCTA -3' |
| LNA-NC    | 5' - CATTAA <u>TGTCGGACA</u> ACTCAAT -3'  |

LNAs are indicated by underline.
