# Supplementary figures and images for: Vectors expressing efficient RNA decoys achieve the long-term suppression of specific microRNA activity in mammalian cells
Source: PubMed Central journal article supplement — Nucleic Acids Res. 2009 Feb 17;37(6):e43. doi: 10.1093/nar/gkp040 (PMC2665227; doi:10.1093/nar/gkp040), 2009-02-17

# Supplementary Figure S3

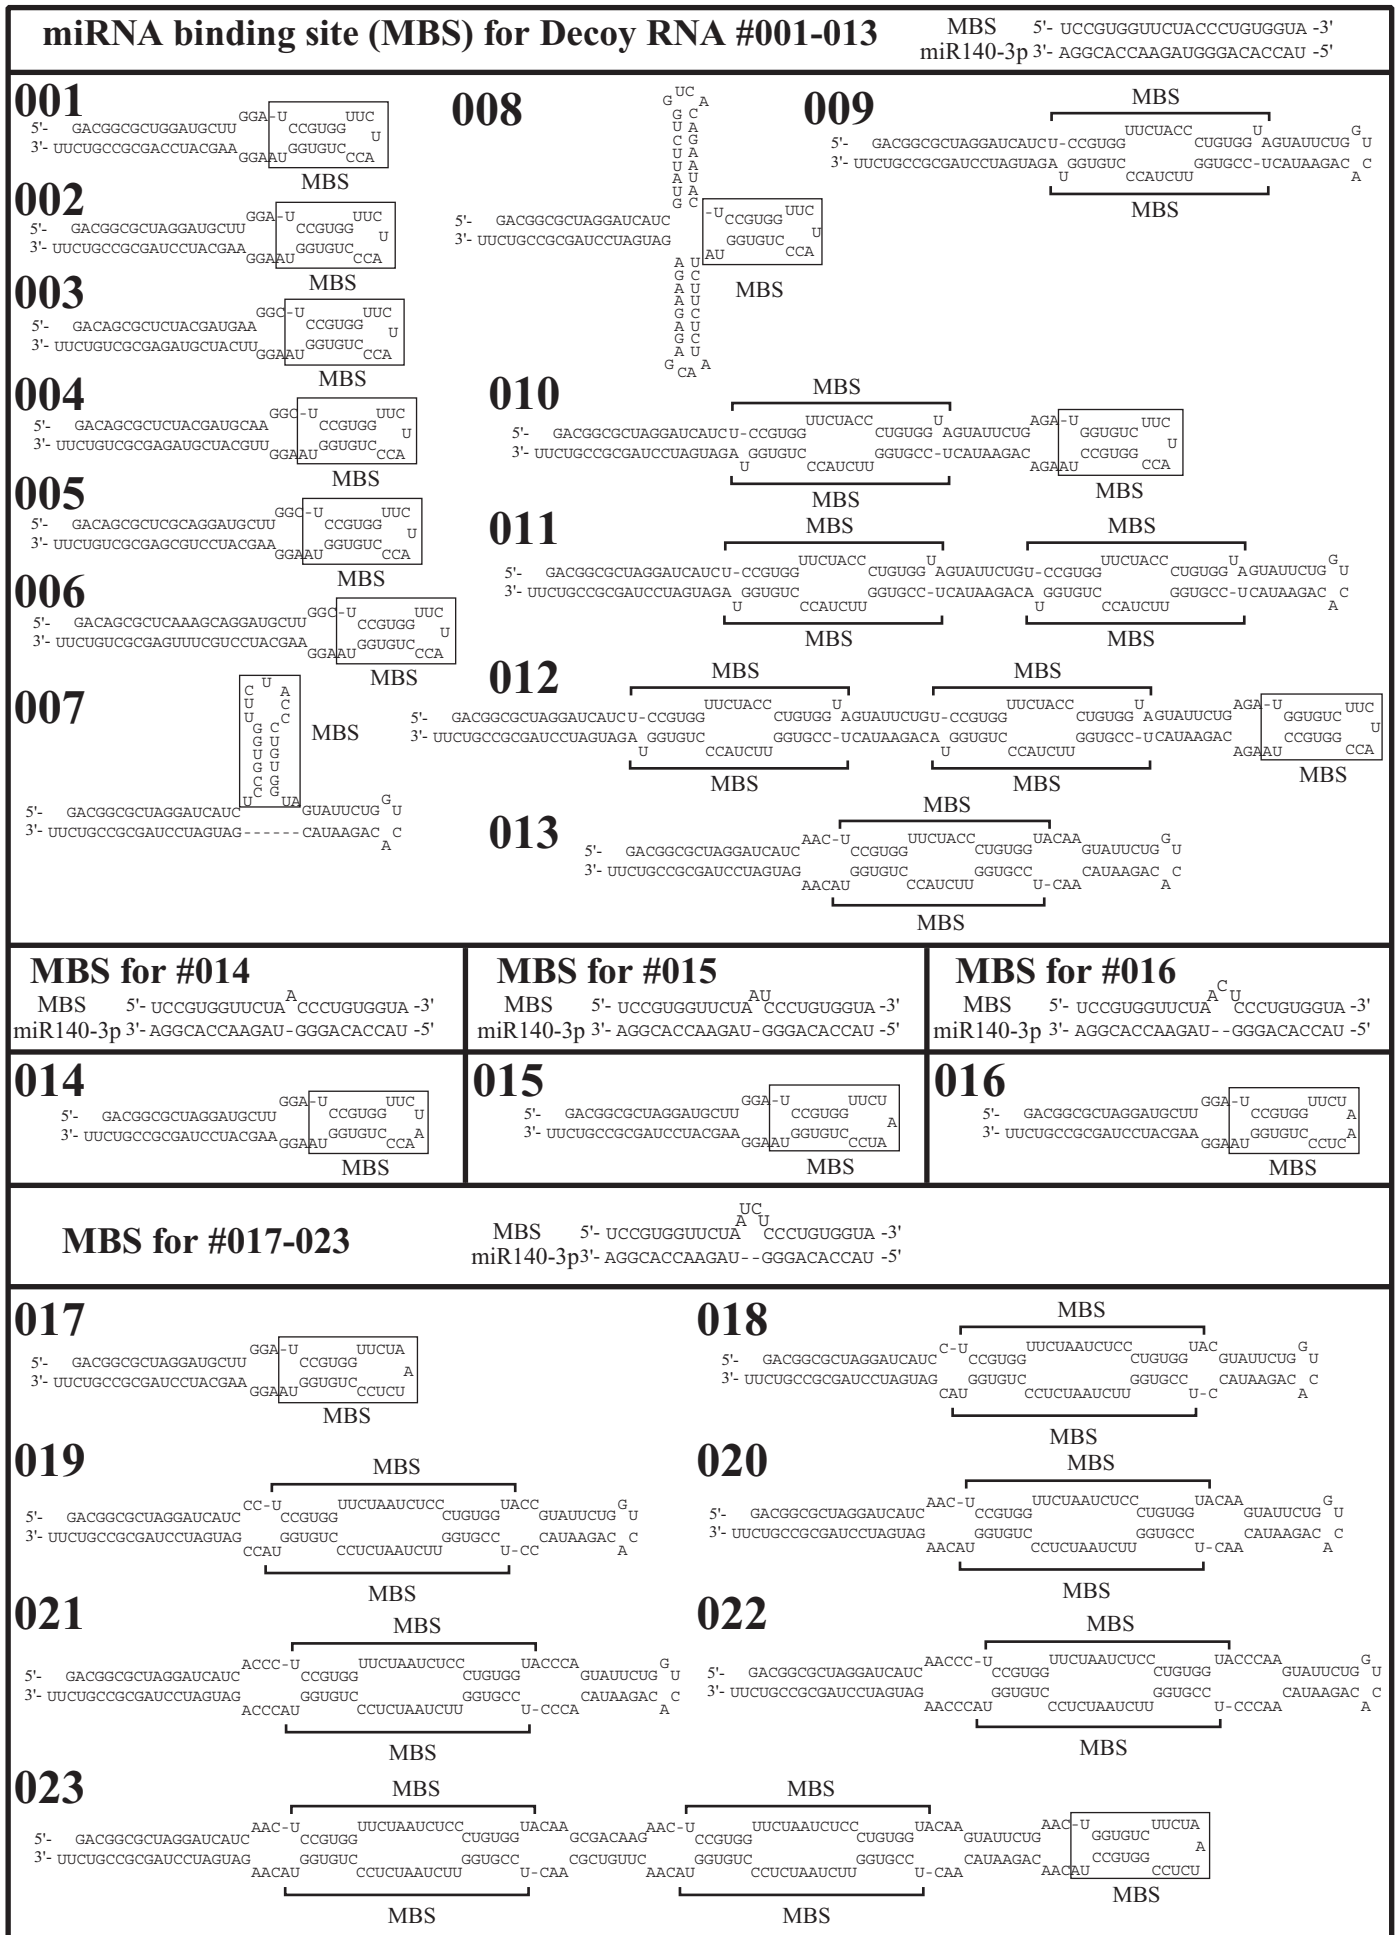

Supplement: gkp040_3.pdf [file gkp040_3.pdf]

# Supplementary Figure S5

## (A) pTK4.12

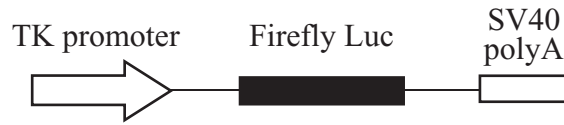

## (B) pGL4.74

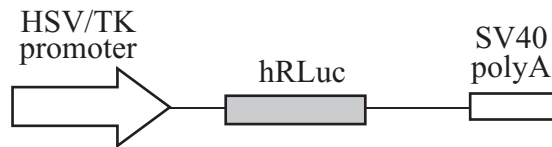

## (C) pGL4.74-miR21T

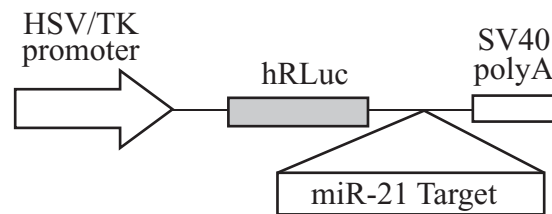

## (D) pGL4.74-miR16T

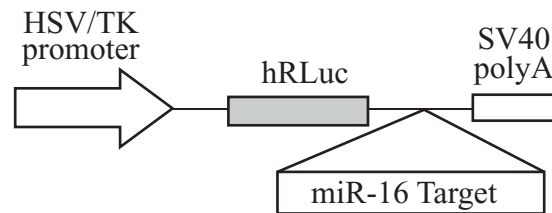

Supplement: gkp040_5.pdf [file gkp040_5.pdf]

# Supplementary Figure S6

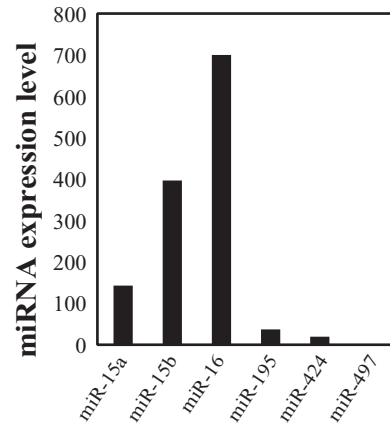

Supplement: gkp040_6.pdf [file gkp040_6.pdf]

# Supplementary Figure S7

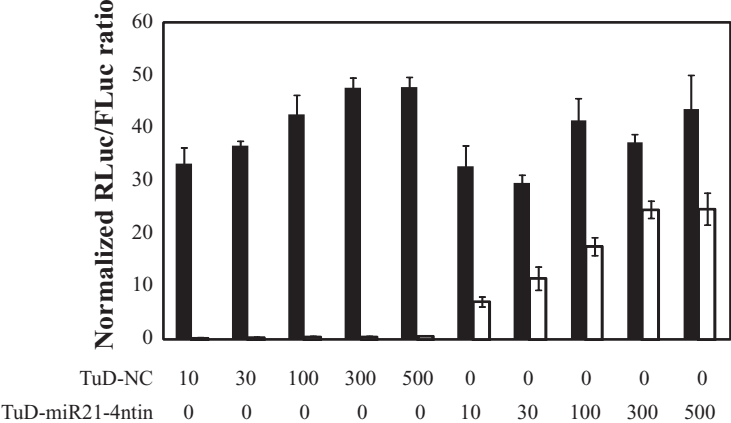

Supplement: gkp040_7.pdf [file gkp040_7.pdf]

# Supplementary Figure S8

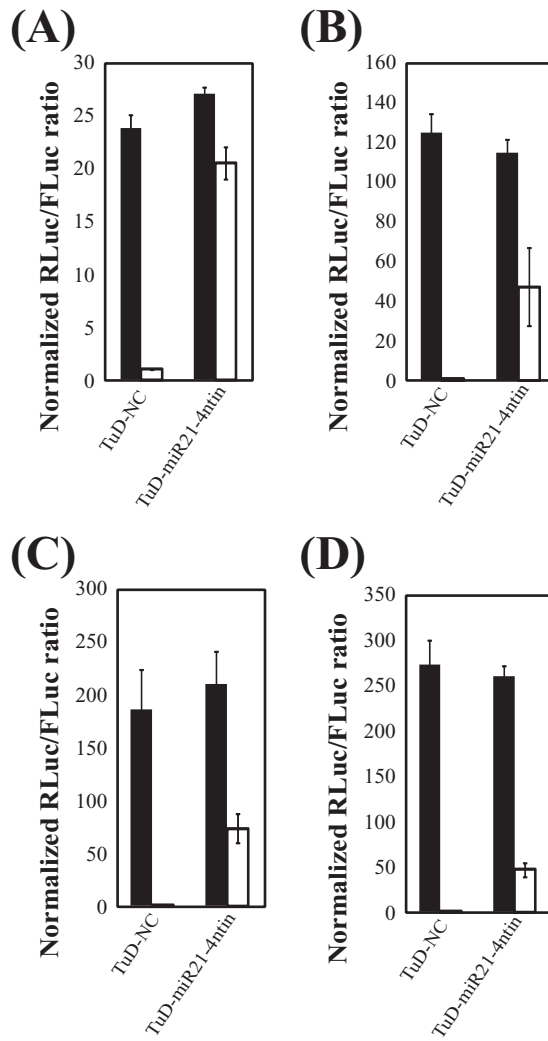

Supplement: gkp040_8.pdf [file gkp040_8.pdf]
